# Supplementary material
Source: PubMed Central journal article supplement (PMC3165779)
Supplement: supp_85_17_8569__1.pdf [file supp_85_17_8569__1.pdf]

**Suppl. Table S1. MS data of the influenza A virus polymerase complex (Set 2: no nuclease treatment).**

| gi number <sup>a</sup> | Protein Name                                          | Sequence coverage (%) | Number of unique peptides | PA <sup>c</sup>  | PA-PB1 <sup>c</sup> | 3P <sup>c</sup> | 3P-WSN | 3P-CA/04 |
|------------------------|-------------------------------------------------------|-----------------------|---------------------------|------------------|---------------------|-----------------|--------|----------|
| 50313055               | PA [Influenza A virus (A/Viet Nam/1203/2004(H5N1))]   | 74.47                 | 55                        | 809 <sup>b</sup> | 732                 | 337             |        |          |
| 50296440               | PB1 [Influenza A virus (A/Viet Nam/1203/2004(H5N1))]  | 67.34                 | 40                        | 0                | 673                 | 286             |        |          |
| 50296548               | PB2 [[Influenza A virus (A/Viet Nam/1203/2004(H5N1))] | 52.59                 | 34                        | 0                | 0                   | 171             |        |          |
| 227977114              | PA [Influenza A virus (A/California/04/2009(H1N1))]   | 51.96                 | 33                        |                  |                     |                 |        | 396      |
| 253828525              | PB1 [Influenza A virus (A/California/04/2009(H1N1))]  | 68.96                 | 40                        |                  |                     |                 |        | 487      |
| 227977116              | PB2 [Influenza A virus (A/California/04/2009(H1N1))]  | 51.38                 | 34                        |                  |                     |                 |        | 258      |
| 194352383              | PA[Influenza A virus (A/WSN/1933(H1N1))]              | 42.60                 | 28                        |                  |                     |                 | 487    |          |
| 194352385              | PB1[Influenza A virus (A/WSN/1933(H1N1))]             | 66.71                 | 37                        |                  |                     |                 | 467    |          |
| 194352388              | PB2[Influenza A virus (A/WSN/1933(H1N1))]             | 49.80                 | 33                        |                  |                     |                 | 563    |          |

a) NCBI gi number (sequence record identifier)

b) Numbers represent the spectral counts for each protein averaged across technical replicates.

c) A/Viet Nam/1203/2004(H5N1)

Note: The labels "PA-PB1" and "3P" refer to purified complexes expected to contain PA and PB1 or PA, PB1 and PB2, respectively.
